# Supplementary material for: Increasing spring temperatures favor oak seed production in temperate areas
Source: PubMed Central journal article supplement (PMC5561138; doi:10.1038/s41598-017-09172-7), 2017-08-17
Supplement: 41598_2017_9172_MOESM1_ESM.pdf [file 41598_2017_9172_MOESM1_ESM.pdf]

1 **SUPPLEMENTARY INFORMATION**

2 **Increasing spring temperatures favor oak seed production in temperate areas**

3 **Authors:**

4 Thomas Caignard<sup>1</sup>, Antoine Kremer<sup>1</sup>, Cyril Firmat<sup>1,2</sup>, Manuel Nicolas<sup>3</sup>, Samuel Venner<sup>4</sup>, Sylvain  
5 Delzon<sup>1</sup>

6 **Affiliations:**

7 1- BIOGECO, INRA, Univ. Bordeaux, 33615 Pessac, France

8 2- INRA, URP3F, RD150. Site du Chêne, BP 86006, 86600 Lusignan, France.

9 3- Office National des Forêts, Département recherche-développement-innovation, Boulevard  
10 de Constance, 77300 Fontainebleau, France.

11 4- Laboratoire de Biométrie et Biologie Evolutive UMR 5558-CNRS, Université de Lyon,  
12 Université Claude Bernard Lyon 1, Villeurbanne F-69365 Lyon, France.

13

14 **Table S1** | Model selection for testing the effect of age and diameter on acorn production in  
 15 both species: *Quercus petraea* and *Quercus robur*. AICc values were obtained from model  
 16 fitted for maximum likelihood (ML). For each model the random factor was the population.  
 17 Models are ranked by AICc values.

| Species                | Linear mixed effect model | K | AICc    | $\Delta$ AICc | AICc weight |
|------------------------|---------------------------|---|---------|---------------|-------------|
| <i>Quercus petraea</i> | Year + Age + Diameter     | 6 | 3880.23 | 0             | 0.53        |
|                        | Year + Age                | 5 | 3881.29 | 1.06          | 0.31        |
|                        | Year                      | 4 | 3883.34 | 3.11          | 0.11        |
|                        | Year + Diameter           | 5 | 3885.33 | 5.1           | 0.04        |
|                        | Constant                  | 3 | 3892.49 | 12.26         | 0           |
| <i>Quercus robur</i>   | Year                      | 4 | 1850.03 | 0             | 0.31        |
|                        | Year + Diameter           | 5 | 1850.42 | 0.39          | 0.26        |
|                        | Constant                  | 3 | 1850.98 | 0.95          | 0.19        |
|                        | Year + Age                | 5 | 1851.5  | 1.47          | 0.15        |
|                        | Year + Age + Diameter     | 6 | 1852.48 | 2.45          | 0.09        |

18

19

20 **Table S2** | Slopes of the linear mixed-effect regression between acorn production in kilograms  
21 per hectare and year ( $b_{\mu}\theta$ ) and the mean age of the population in 1994 ( $d_{\mu}A$ ) for *Q. petraea*.  
22 Bold characters correspond to significant regression slopes. The 95% confidence intervals are  
23 indicated in square brackets.

|           | <i>Quercus petraea</i>      |
|-----------|-----------------------------|
| $b_{\mu}$ | <b>19.73 [8.29, 31.16]</b>  |
| $d_{\mu}$ | <b>-1.89 [-3.71, -0.07]</b> |

24

25

26 **Table S3** | Comparison of Model [4] with a similar mixed effect model taking into account, in  
 27 addition to spring temperature, the sum of precipitation as a fixed effect for different seasons  
 28 and for both species (a and b). Comparison were carried out using the Akaike Information  
 29 Criterion corrected for small sample size (AICc).

| Species                | Period of the year | Linear mixed effect model   | K | AICc    | $\Delta AICc$ | AICc weight |
|------------------------|--------------------|-----------------------------|---|---------|---------------|-------------|
| <i>Quercus petraea</i> | Winter             | Temperature                 | 4 | 3873.68 | 0             | 0.65        |
|                        |                    | Temperature + Precipitation | 5 | 3874.9  | 1.22          | 0.35        |
|                        | Spring             | Temperature                 | 4 | 3873.68 | 0             | 0.66        |
|                        |                    | Temperature + Precipitation | 5 | 3875.04 | 1.36          | 0.34        |
|                        | Summer             | Temperature                 | 4 | 3873.68 | 0             | 0.54        |
|                        |                    | Temperature + Precipitation | 5 | 3873.97 | 0.28          | 0.46        |
|                        | Autumn             | Temperature                 | 4 | 3873.68 | 0             | 0.58        |
|                        |                    | Temperature + Precipitation | 5 | 3874.3  | 0.62          | 0.42        |
|                        | Year               | Temperature                 | 4 | 3873.68 | 0             | 0.74        |
|                        |                    | Temperature + Precipitation | 5 | 3875.75 | 2.06          | 0.26        |
| <i>Quercus robur</i>   | Winter             | Temperature                 | 4 | 1845.82 | 0             | 0.71        |
|                        |                    | Temperature + Precipitation | 5 | 1847.61 | 1.8           | 0.29        |
|                        | Spring             | Temperature                 | 4 | 1845.82 | 0             | 0.7         |
|                        |                    | Temperature + Precipitation | 5 | 1847.48 | 1.66          | 0.3         |
|                        | Summer             | Temperature                 | 4 | 1845.82 | 0             | 0.71        |
|                        |                    | Temperature + Precipitation | 5 | 1847.62 | 1.8           | 0.29        |
|                        | Autumn             | Temperature                 | 4 | 1845.82 | 0             | 0.73        |
|                        |                    | Temperature + Precipitation | 5 | 1847.81 | 2             | 0.27        |
|                        | Year               | Temperature                 | 4 | 1845.82 | 0             | 0.75        |
|                        |                    | Temperature + Precipitation | 5 | 1847.99 | 2.17          | 0.25        |

30

31

32 **Table S4** | Regression slopes of the linear mixed-effect regression between acorn production  
 33 in kilograms per hectare and  $b_{\mu}$  the mean population temperature regressed against year ( $T_p$ )  
 34 and  $c_{\mu}$  the mean yearly temperature regressed against population ( $T_y$ ) estimated from model  
 35 [4] for each species. Bold characters correspond to significant regression slopes. The 95%  
 36 confidence intervals are indicated in square brackets.

37

|           | <i>Quercus petraea</i>      | <i>Quercus robur</i>        |
|-----------|-----------------------------|-----------------------------|
| $b_{\mu}$ | 10.53 [-68.0, 89.0]         | 5.17 [-63.1, 73.4]          |
| $c_{\mu}$ | <b>147.78 [90.7, 205.0]</b> | <b>119.78 [36.2, 203.3]</b> |

38

39

40 **Table S5** | Site description and climate for the temporal gradient

| Species                | Station | Latitude | Longitude | Altitude (m) | Temperature (°C) | Precipitation (mm) |
|------------------------|---------|----------|-----------|--------------|------------------|--------------------|
| <i>Quercus petraea</i> | CHS 81  | 44°02'N  | 01°44'E   | 300          | 12.28            | 848.1              |
| <i>Quercus petraea</i> | CHS 01  | 46°10'N  | 05°14'E   | 260          | 11.04            | 992.2              |
| <i>Quercus petraea</i> | CHS 86  | 46°37'N  | 00°29'E   | 116          | 12.13            | 789.3              |
| <i>Quercus petraea</i> | CHS 03  | 46°40'N  | 02°43'E   | 260          | 11.53            | 776                |
| <i>Quercus petraea</i> | CHS 58  | 46°58'N  | 03°39'E   | 270          | 11.41            | 943.7              |
| <i>Quercus petraea</i> | CHS 21  | 47°04'N  | 05°04'E   | 220          | 11.04            | 780.3              |
| <i>Quercus petraea</i> | CHS 18  | 47°15'N  | 02°07'E   | 176          | 11.39            | 839.3              |
| <i>Quercus petraea</i> | CHS 41  | 47°34'N  | 01°15'E   | 127          | 11.58            | 656.3              |
| <i>Quercus petraea</i> | CHS 68  | 47°41'N  | 07°28'E   | 256          | 10.43            | 845.2              |
| <i>Quercus petraea</i> | CHS 72  | 47°47'N  | 00°22'E   | 170          | 11.64            | 766.5              |
| <i>Quercus petraea</i> | CHS 88  | 48°01'N  | 06°02'E   | 330          | 9.97             | 1068.5             |
| <i>Quercus petraea</i> | CHS 35  | 48°10'N  | 01°32'W   | 80           | 11.47            | 807.1              |
| <i>Quercus petraea</i> | CHS 10  | 48°17'N  | 04°27'E   | 160          | 11.04            | 792.4              |
| <i>Quercus petraea</i> | CHS 61  | 48°31'N  | 00°40'E   | 220          | 10.74            | 808.5              |
| <i>Quercus petraea</i> | CHS 57a | 48°52'N  | 06°29'E   | 315          | 10.36            | 863.3              |
| <i>Quercus petraea</i> | CHS 57b | 49°00'N  | 07°27'E   | 320          | 9.85             | 863                |
| <i>Quercus petraea</i> | CHS 51  | 49°02'N  | 04°57'E   | 180          | 10.52            | 864.7              |
| <i>Quercus petraea</i> | CHS 27  | 49°21'N  | 01°30'E   | 175          | 10.29            | 794.6              |
| <i>Quercus petraea</i> | CHS 60  | 49°23'N  | 02°18'E   | 55           | 10.81            | 695                |
| <i>Quercus robur</i>   | CHP 65  | 43°12'N  | 00°02'W   | 370          | 11.9             | 997.5              |
| <i>Quercus robur</i>   | CHP 40  | 43°44'N  | 00°50'W   | 20           | 13.52            | 987.7              |
| <i>Quercus robur</i>   | CHP 18  | 46°49'N  | 02°34'E   | 175          | 11.5             | 827                |
| <i>Quercus robur</i>   | CHP 71  | 46°58'N  | 05°14'E   | 190          | 11.2             | 773.9              |
| <i>Quercus robur</i>   | CHP 49  | 47°27'N  | 00°01'EW  | 57           | 12.23            | 704.9              |
| <i>Quercus robur</i>   | CHP 70  | 47°52'N  | 06°12'E   | 240          | 10.44            | 1167.7             |
| <i>Quercus robur</i>   | CHP 10  | 48°20'N  | 04°18'E   | 115          | 11.04            | 710.9              |
| <i>Quercus robur</i>   | CHP 55  | 49°01'N  | 05°46'E   | 220          | 10.12            | 844.6              |
| <i>Quercus robur</i>   | CHP 59  | 50°10'N  | 03°45'E   | 149          | 10.15            | 767.3              |

41

42

43 **Table S6** | Site description and climate for the spatial gradient

| Valley | Station   | Species                | Latitude | Longitude | Altitude (m) | Gradient (m) | Mean annual temperatures (°C) |       |      |      |
|--------|-----------|------------------------|----------|-----------|--------------|--------------|-------------------------------|-------|------|------|
|        |           |                        |          |           |              |              | 2012                          | 2013  | 2014 | 2015 |
| Luz    | Laveyron  | <i>Quercus petraea</i> | 43°45'N  | 00°13'E   | 131          | 100          | 13.5                          | 12.8  | 13.7 | 13.5 |
| Luz    | Ibos      | <i>Quercus petraea</i> | 43°15'N  | 00°00'W   | 387          | 400          | 12.5                          | 12.11 | 12.8 | 13.3 |
| Luz    | Chèze     | <i>Quercus petraea</i> | 42°55'N  | 00°02'W   | 803          | 800          | 10.2                          | 10.4  | 11.5 | 11.9 |
| Luz    | Gèdre Bas | <i>Quercus petraea</i> | 42°47'N  | 00°25'W   | 1235         | 1200         | 9.2                           | 8.7   | 9.8  | 10.7 |
| Luz    | Péguère   | <i>Quercus petraea</i> | 42°52'N  | 00°07'W   | 1630         | 1600         | 7.8                           | 6.9   | 8.1  | 8.8  |
| Ossau  | Josbaig   | <i>Quercus petraea</i> | 43°13'N  | 00°44'W   | 259          | 100          | 11.7                          | 12.9  | 14   | 13.7 |
| Ossau  | Bager     | <i>Quercus petraea</i> | 43°07'N  | 00°32'W   | 422          | 400          | 10.8                          | 11.7  | 12.7 | 12.5 |
| Ossau  | Le Hourcq | <i>Quercus petraea</i> | 42°54'N  | 00°26'W   | 841          | 800          | 9.4                           | 8.4   | 9.7  | 9.7  |
| Ossau  | Gabas     | <i>Quercus petraea</i> | 42°53'N  | 00°25'W   | 1194         | 1200         | 8.9                           | 8.3   | 9.5  | 9.9  |
| Ossau  | Artouste  | <i>Quercus petraea</i> | 42°53'N  | 00°24'W   | 1614         | 1600         | 7.1                           | 6.2   | 7.7  | 8.3  |

45 **Table S7** | Regression slopes of the linear mixed-effect regression between acorn production  
 46 (kg/ha) and mean temperature (°C) for different periods of time within the spring season.  
 47 Regression slopes were estimated from model [3] for the temporal gradient and model [5] for  
 48 the spatial gradient. Regression slopes and their confidence intervals, and R<sup>2</sup> values are  
 49 indicated. Bold characters correspond to significant regression slopes.

| Species                | Period        | Temporal                    |                | Spatial                   |                |
|------------------------|---------------|-----------------------------|----------------|---------------------------|----------------|
|                        |               | Slope                       | R <sup>2</sup> | Slope                     | R <sup>2</sup> |
| <i>Quercus petraea</i> | March         | 16.97 [-13.9, 47.8]         | 0.04           | 12.17 [-4.9, 25.7]        | 0.04           |
|                        | April         | <b>94.88 [61.5, 128.4]</b>  | 0.64           | <b>22.25 [10.0, 35.6]</b> | 0.16           |
|                        | May           | 29.97 [-9.1, 69.0]          | 0.09           | <b>24.12 [12.9, 36.7]</b> | 0.25           |
|                        | June          | 24.13 [-3.8, 52.2]          | 0.20           | <b>29.13 [12.8, 49.4]</b> | 0.24           |
|                        | March - April | <b>102.98 [56.6, 152.4]</b> | 0.41           | <b>20.38 [6.3, 35.4]</b>  | 0.10           |
|                        | April - May   | <b>111.89 [63.1, 146.1]</b> | 0.73           | <b>33.42 [17.6, 58.9]</b> | 0.33           |
|                        | May - June    | <b>41.59 [1.1, 86.1]</b>    | 0.30           | <b>28.16 [14.4, 44.7]</b> | 0.26           |
| <i>Quercus robur</i>   | March         | -1.72 [-36.0, 32.5]         | 0              | -                         | -              |
|                        | April         | <b>54.07 [14.4, 93.7]</b>   | 0.45           | -                         | -              |
|                        | May           | 45.36 [-2.2, 93.0]          | 0.25           | -                         | -              |
|                        | June          | 5.88 [-31.1, 42.8]          | 0              | -                         | -              |
|                        | March - April | 32.58 [-13.3, 78.5]         | 0.08           | -                         | -              |
|                        | April - May   | <b>72.66 [19.6, 120.5]</b>  | 0.34           | -                         | -              |
|                        | May - June    | 31.03 [-19.5, 81.6]         | 0.08           | -                         | -              |



51 **Figure S1** | Localization of the *Quercus petraea* (orange) and *Quercus robur* (blue) populations  
52 of the temporal gradient. The base map featuring the forested areas was extracted free of  
53 charge and use from the IGN National Forest Inventory cartography site (IGN 2015 –  
54 Départements administratifs, GEOFLA® 2.1). The map was generated using the free and open  
55 source geographic information system Qgis 2.6<sup>56</sup>.

56

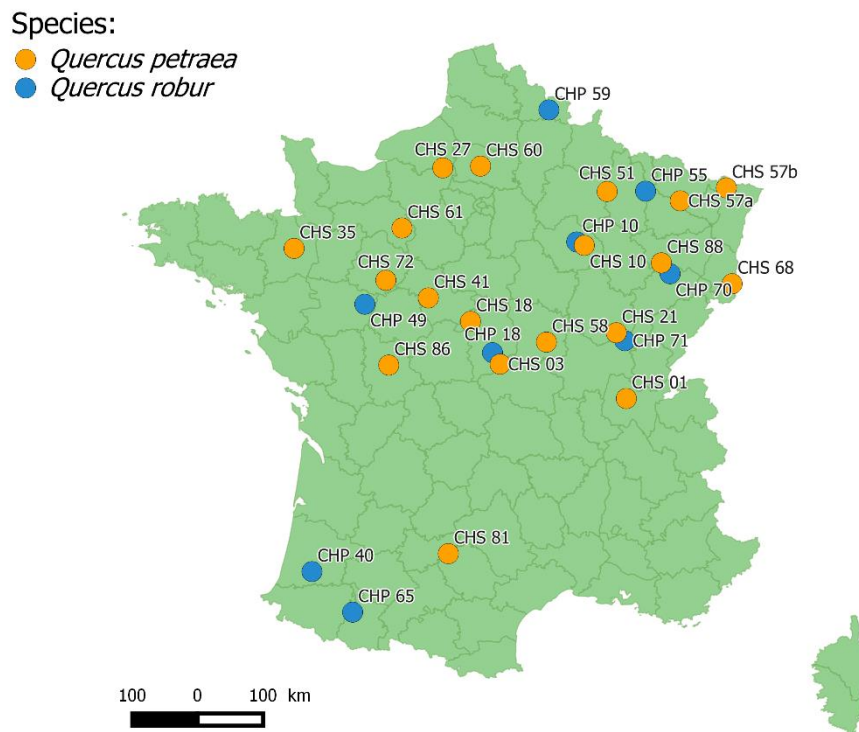

57

58

59 **Figure S2** | Patterns of acorn production from 1994 to 2007 for each population of the  
60 temporal gradient (RENECOFOR). Each dot corresponds to the amount of acorn produced in  
61 kilogram per hectare for each site per year.

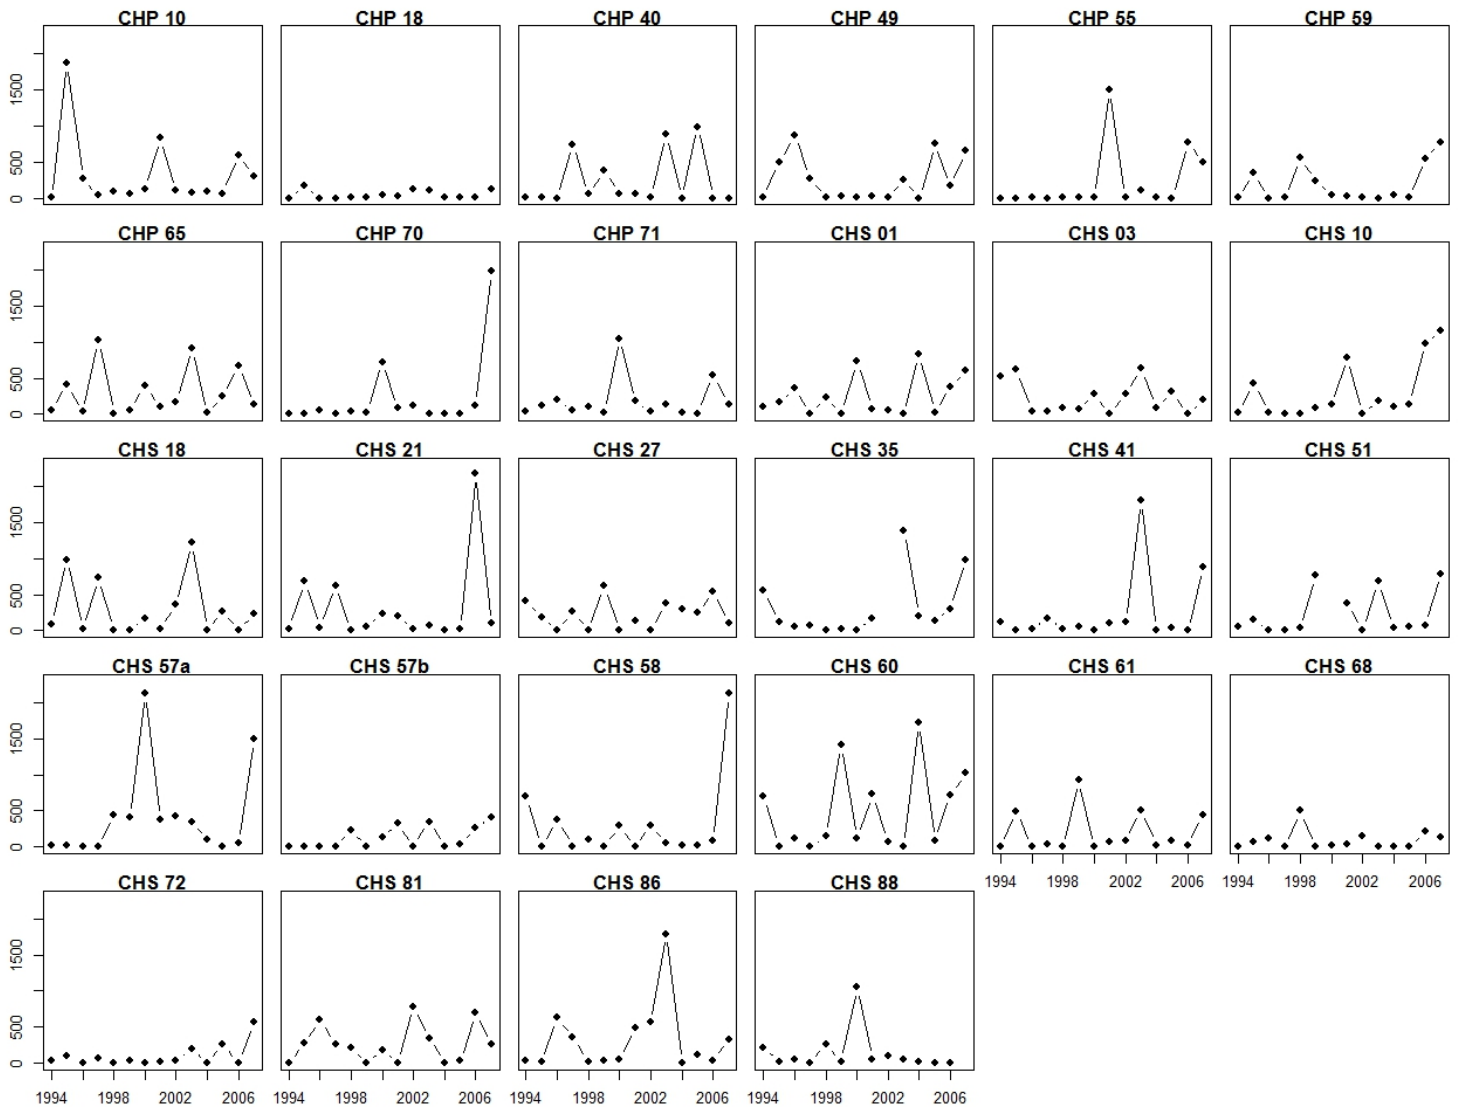

63 **Figure S3** | Changes in the degree of reproductive synchrony, measured by the coefficient of  
64 Spearman, according to the distance between populations. The degree of synchrony is plotted  
65 for *Quercus petraea* (a) and *Quercus robur* (b). The slope of the regression line, calculated from  
66 a linear model and represented for every 100 km, are given for both species with the  
67 coefficient of determination ( $R^2$ ).

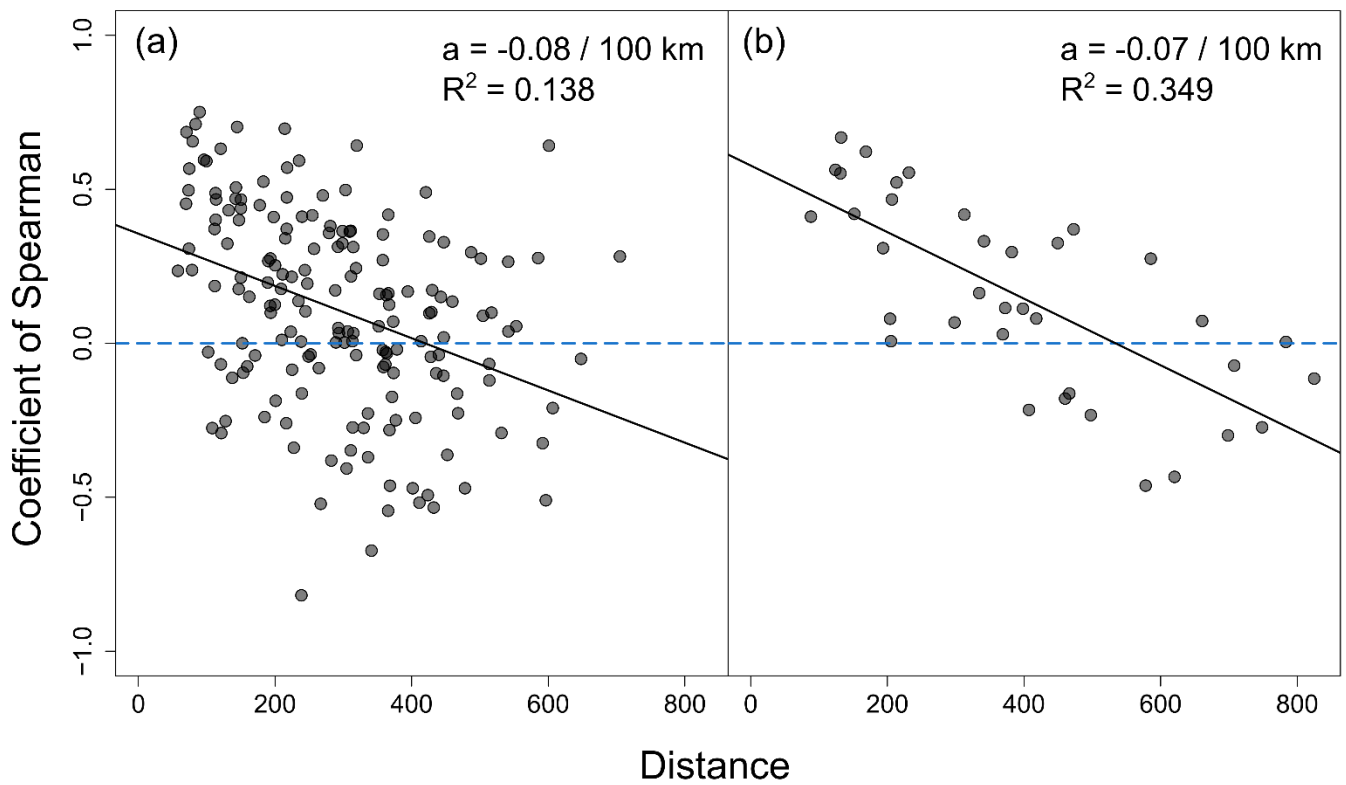

68

69 **Figure S4** | We evaluated the change in temperature from 1962 to 2012 separately for the  
70 two species populations with a linear mixed effect model:

71 
$$Z_{jt} = a_{\mu} + b_{\mu}t + (a_j) + \varepsilon_{jt}$$

72 with  $a_{\mu}$  denoting the overall intercept and  $b_{\mu}$  the overall slope of time (t) on temperature,  $a_j$   
73 the random deviation associated to population j, and the residuals  $\varepsilon_{jt}$  Slopes and confidence  
74 intervals are estimated from the previous model and are represented in the following figure.  
75 Each dot represents the average temperature of each sites for one year on both species. The  
76 coefficient of determination ( $R^2$ ) calculated between the previous model and the mean  
77 temperature of each site are indicated. Years of seed production monitoring are indicating  
78 between the two vertical dashed lines.

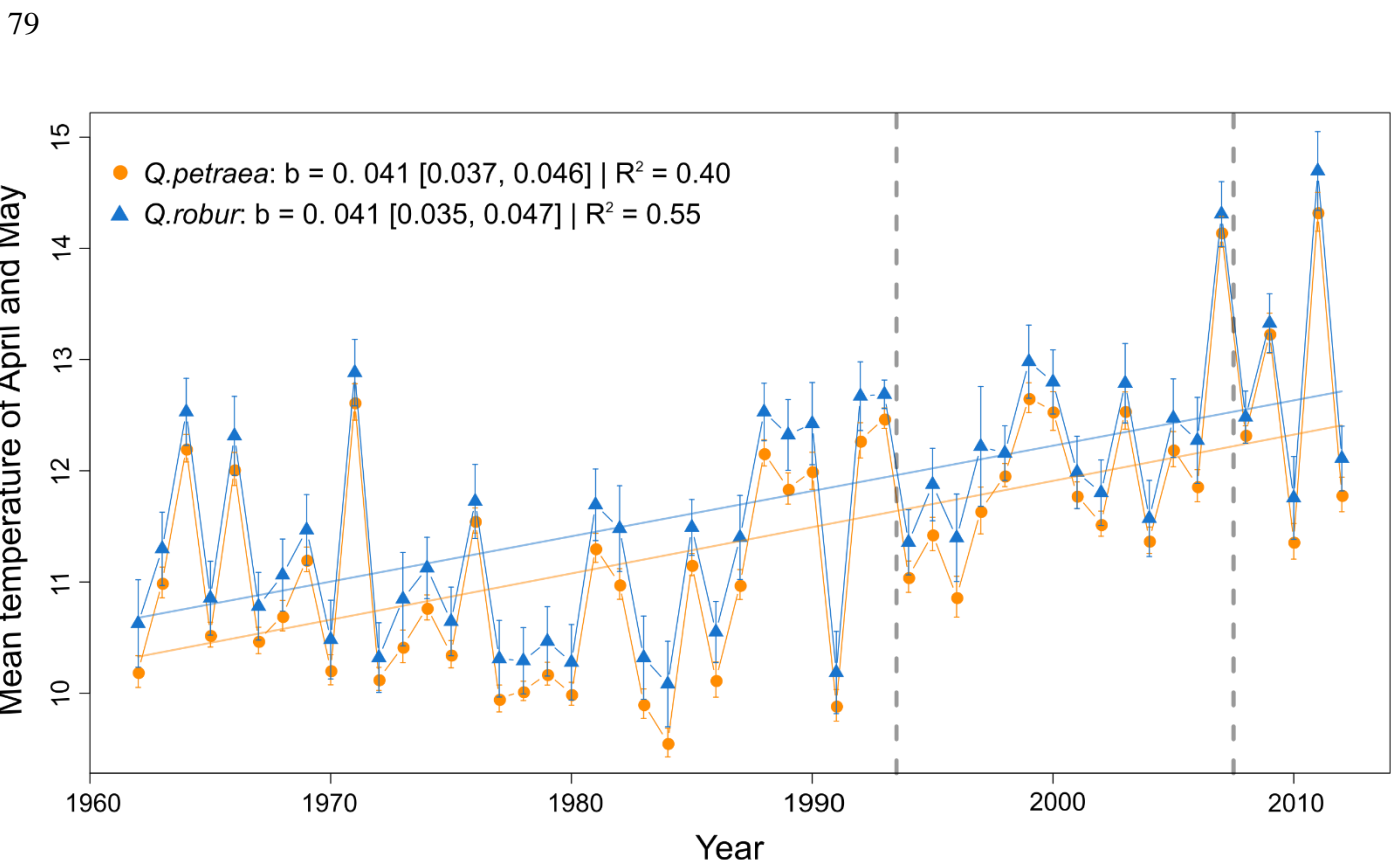

82 **Figure S5** | Relationships between acorn production and mean spring temperature for each  
83 population of *Quercus petraea* (a) and *Quercus robur* (b). For both species, acorn production  
84 data for each population and year were binned into 19 temperature classes of approximately  
85 the same size, 14 for *Q.petraea* and 6 or 7 for *Q.robur*. The temporal trends in acorn  
86 production for each population are indicated by each grey lines.

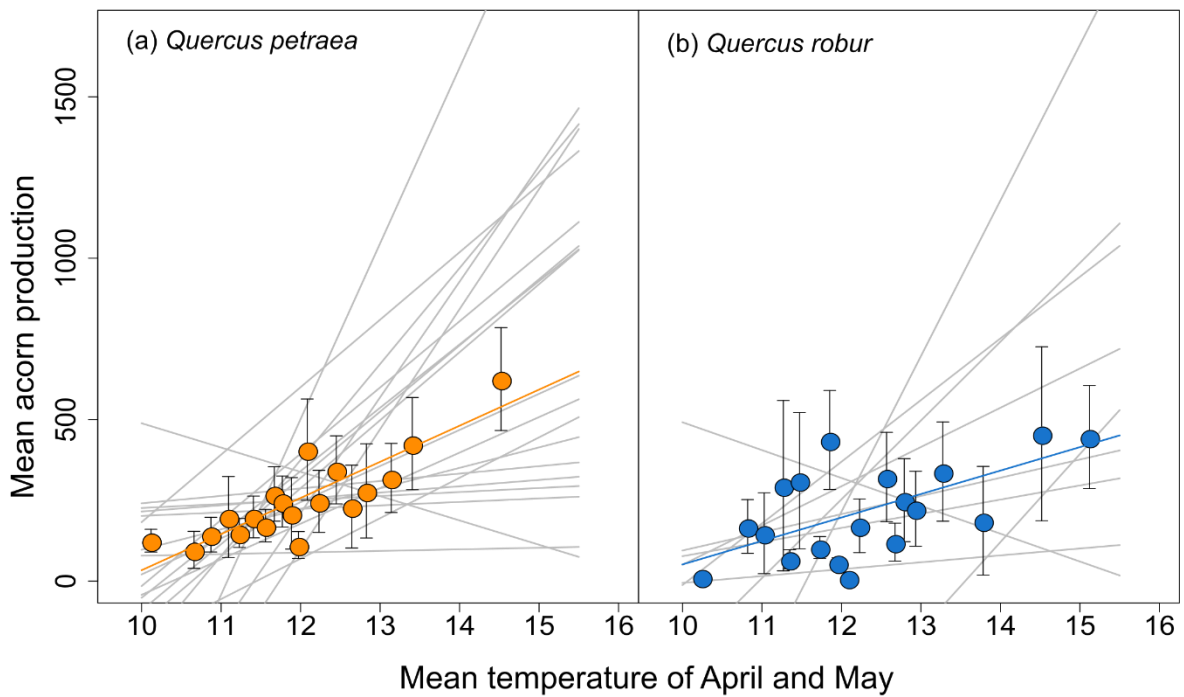

87

88

89 **Figure S6** | Comparison of Model [3] with the Null Model (i.e. without the fixed temperature  
 90 effect implemented) using the Akaike Information Criterion corrected for small sample size  
 91 (AICc), tested for each month and every two months on *Q. petraea* (a and c) and *Q. robur* (b  
 92 and d). The dashed red line represents an AICc of 4, considered as an empirical level for which  
 93 support to the null model is considerably low<sup>53</sup>.

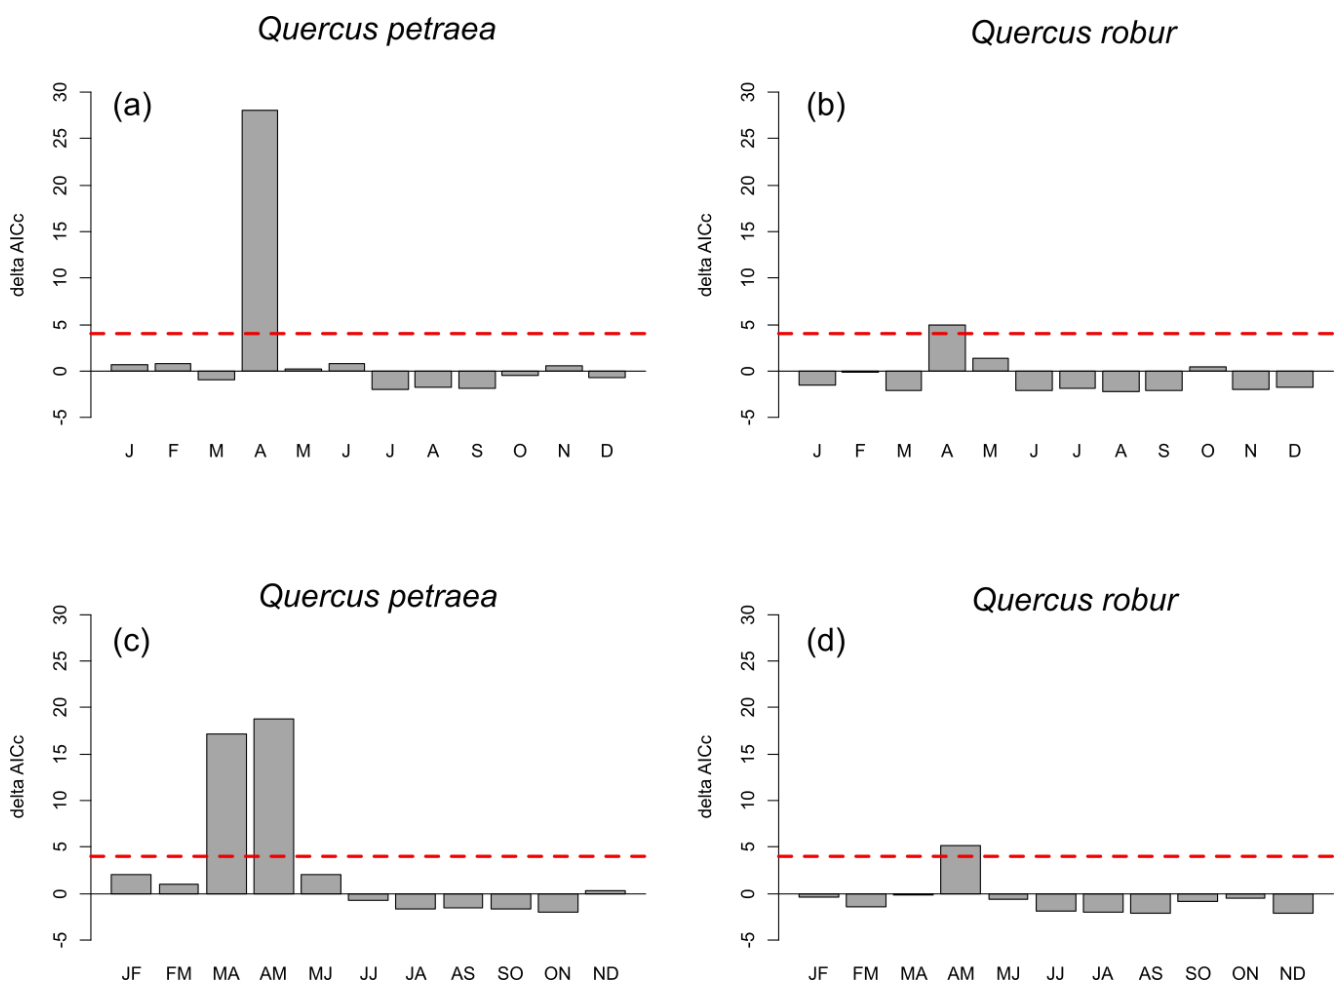

94

95

96 References

- 97 53. Burnham, K.P., and Anderson, D.R. Model Selection and Multimodel Inference: A Practical  
98 Information-Theoretic Approach (Springer Science & Business Media) (2003).
- 99 56. Quantum GIS Development Team. Quantum GIS Geographic Information System. Open  
100 Source Geospatial Foundation Project. <http://qgis.osgeo.org> (2015).
